# Supplementary material for: Effect of increasing fruit and vegetable intake by dietary intervention on nutritional biomarkers and attitudes to dietary change: a randomised trial
Source: PubMed Central journal article supplement (PMC6060837; doi:10.1007/s00394-017-1469-0), 2017-05-30
Supplement: 394_2017_1469_MOESM1_ESM.pdf [file 394_2017_1469_MOESM1_ESM.pdf]

| Intervention     | Day 1          | Day 2                           | Day 3            | Day 4            | Day 5                           | Day 6         | Day 7                              |
|------------------|----------------|---------------------------------|------------------|------------------|---------------------------------|---------------|------------------------------------|
|                  |                |                                 |                  |                  |                                 |               |                                    |
| Fruit            | strawberries   | apple                           | plums            | apple            | plums                           | grapes        | strawberries                       |
|                  | orange         | kiwi fruit                      | pear             | grapes           | orange                          | pear          | banana                             |
|                  |                |                                 |                  |                  |                                 |               |                                    |
| Salad vegetables | mixed leaf     | mixed leaf                      | mixed leaf       | mixed leaf       | mixed leaf                      | mixed leaf    | mixed leaf                         |
|                  |                | tomatoes                        | tomatoes         | tomatoes         | tomatoes                        | tomatoes      | tomatoes                           |
|                  |                | red pepper                      | cucumber         |                  | red pepper                      | cucumber      |                                    |
|                  |                |                                 |                  |                  |                                 |               |                                    |
| Vegetable        | crunchy medley | onion, sweet pepper & mangetout | Winter selection | Winter selection | onion, sweet pepper & mangetout | mixed cabbage | carrot, cauliflower & broccoli mix |
|                  | carrots        |                                 |                  |                  |                                 | carrots       | green beans                        |
|                  |                |                                 |                  |                  |                                 |               |                                    |
| Fruit Juice      | OJ             | OJ                              | OJ               | OJ               | OJ                              | OJ            | OJ                                 |
|                  | AJ             | AJ                              | AJ               | AJ               | AJ                              | AJ            | AJ                                 |
|                  |                |                                 |                  |                  |                                 |               |                                    |
| Daily weight (g) | 480            | 480                             | 480              | 480              | 480                             | 480           | 480                                |
| Juice (ml)       | 300            | 300                             | 300              | 300              | 300                             | 300           | 300                                |

**Supplementary Table 1. Fruit, vegetable and juice provision.**

Participants in the intervention group were asked to consume all of the fruits, vegetables and 2 small glasses (150ml) of fruit juices (apple; AJ or orange; OJ) from the foods in the table, in addition to their normal intake, ensuring equivalent consumption of fruits and vegetables. All fruit, vegetables and juice were provided (twice weekly) to the participants. The same fruits and vegetables were provided to all volunteers unless a participant declared a strong dislike for a particular item, in which case it was replaced. Crunchy medley (cabbage mixture); Winter selection (carrots, cauliflower, sprouts); Mixed leaf (rocket, mizuria, red chard).
